# Supplementary material for: A Real-World Study of the Association between a Brief Group Psychoeducation and the Course of Bipolar Disorder
Source: MDPI journal article supplement (doi:10.3390/ijerph18095019), 2021-05-10
Supplement: s1 [file s1]

**Table S1.** Comparison of the demographic and clinical characteristics between the excluded subjects (N = 7) and the exposed cohort (N = 16). \*: Fisher's exact test.

|                                         | Exposed Cohort | Excluded Subjects | Statistical Test | p-Value |
|-----------------------------------------|----------------|-------------------|------------------|---------|
| Age [mean (SD)]                         | 37.19 (6.91)   | 35.07 (7.23)      | t = -0.6670      | 0.5120  |
| Sex, women [N (%)]                      | 9 (56.25%)     | 3 (42.86%)        | chi2 = 0.3500    | 0.667*  |
| Duration of illness, years [M (SD)]     | 8.31 (8.87)    | 8.71 (7.20)       | t = 0.1052       | 0.9172  |
| Educational level [N (%)]               |                |                   | chi2 = 0.0587    | 1.000*  |
| Primary studies                         | 0 (0%)         | 0 (0%)            |                  |         |
| Secondary studies                       | 6 (37.50%)     | 3 (42.86%)        |                  |         |
| Superior studies                        | 10 (62.50%)    | 4 (57.14%)        |                  |         |
| Basal insight level [N (%)]             |                |                   | chi2 = 2.3896    | 0.445*  |
| Poor                                    | 1 (6.25%)      | 0 (0.00%)         |                  |         |
| Partial                                 | 6 (37.50%)     | 5 (71.43%)        |                  |         |
| Good                                    | 9 (56.25%)     | 2 (28.57%)        |                  |         |
| Basal treatment adherence level [N (%)] |                |                   | chi2 = 1.6066    | 0.596*  |
| Poor                                    | 2 (12.50%)     | 0 (0.00%)         |                  |         |
| Partial                                 | 2 (12.50%)     | 2 (28.57%)        |                  |         |
| Good                                    | 12 (75.00%)    | 5 (71.43%)        |                  |         |
